# Supplementary material for: Identification of β scission products from free radical polymerizations of butyl acrylate at high temperature
Source: Royal Society of Chemistry journal article supplement (doi:10.1039/c9py00103d), 2019-01-01
Supplement: c9py00103d1.pdf [file c9py00103d1.pdf]

Supporting Information

**Identification of  $\beta$  scission products from free radical polymerizations of butyl acrylate at high temperature**

Marco Drache, Maria Stehle, Jonas Mätzig, Katrin Brandl, Marcel Jungbluth, Jan C. Namyslo, Andreas Schmidt, Sabine Beuermann

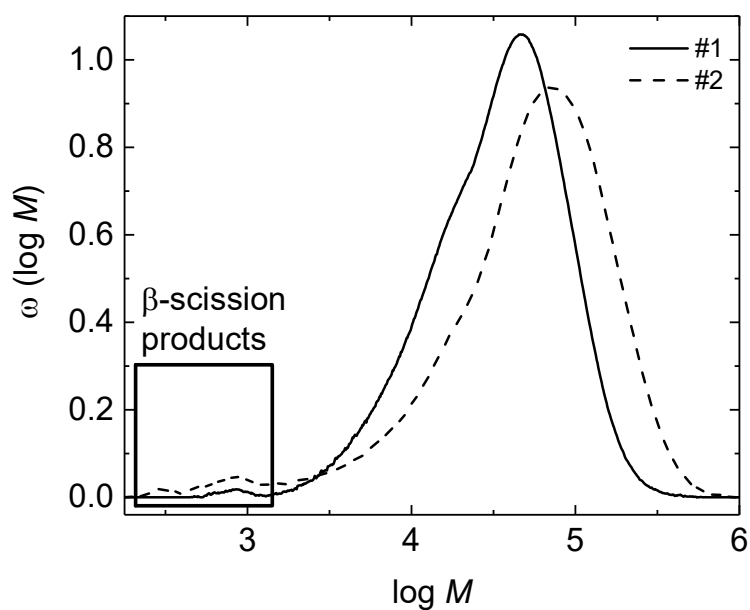

Figure S1: Molar mass distributions for polymer samples obtained from thermally initiated batch BA polymerizations at 120°C. #1 and #2 refer to the samples in Table 1.

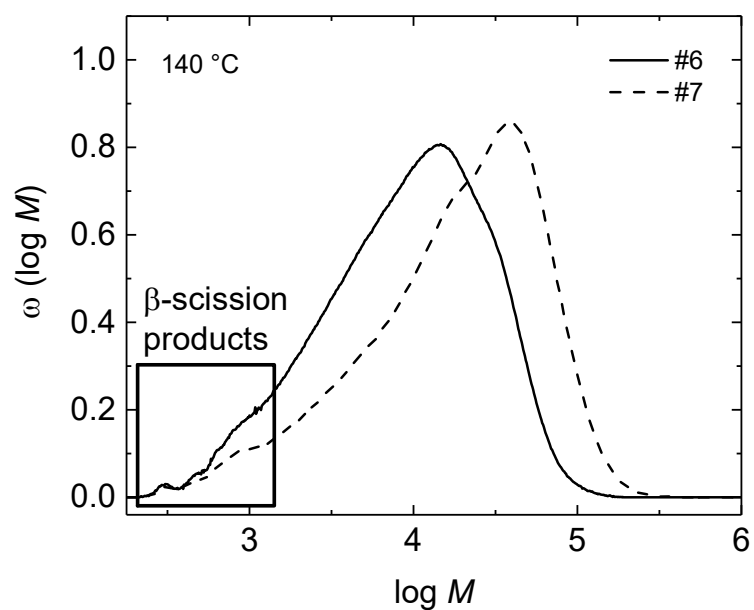

Figure S2: Molar mass distributions for polymer samples obtained from thermally initiated batch BA polymerizations at 140°C. #6 and #7 refer to the samples in Table 1.

Table S1: Analytical SEC results for the fractions obtained after preparative SEC of a polymer obtained via semi-batch polymerization at 130°C.

| fraction | content | $M_n / \text{g}\cdot\text{mol}^{-1}$ | $M_w / \text{g}\cdot\text{mol}^{-1}$ | D    |
|----------|---------|--------------------------------------|--------------------------------------|------|
| 1        | 0.161   | 9056                                 | 10280                                | 1.14 |
| 2        | 0.372   | 5733                                 | 6679                                 | 1.17 |
| 3        | 0.200   | 3541                                 | 4348                                 | 1.23 |
| 4        | 0.128   | 2178                                 | 2940                                 | 1.35 |
| 5        | 0.066   | 1352                                 | 2118                                 | 1.57 |
| 6        | 0.034   | 876                                  | 1600                                 | 1.83 |
| 7        | 0.039   | 588                                  | 1192                                 | 2.02 |
| 6+7      | 0.073   | 757                                  | 1443                                 | 1.91 |
| all      |         | 2148                                 | 4633                                 | 2.16 |

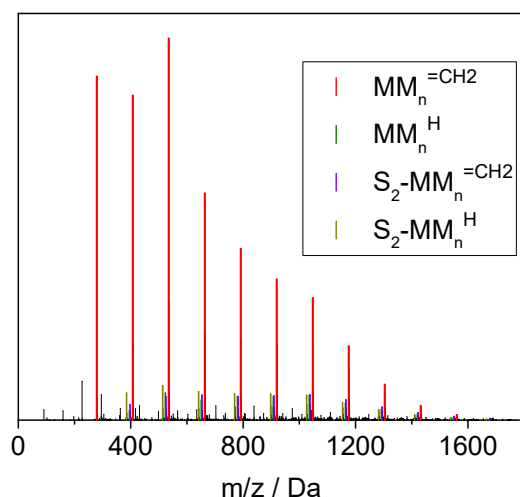

Figure S3: ESI-MS data of  $\beta$  scission products: semi-batch polymerization at 130°C after 1 h in xylene ( $S_1$ : xylene end group).

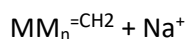

| n  | $m/z$ / Da<br>experimental | $m/z$ / Da<br>theoretical | $\Delta m/z$ / Da | intensity |
|----|----------------------------|---------------------------|-------------------|-----------|
| 2  | 279.1567                   | 279.1567                  | 3.0E-05           | 591672    |
| 3  | 407.2404                   | 407.2404                  | 0.0E+00           | 558841    |
| 4  | 535.3240                   | 535.3241                  | -1.3E-04          | 657030    |
| 5  | 663.4076                   | 663.4079                  | -2.6E-04          | 390392    |
| 6  | 791.4911                   | 791.4916                  | -4.9E-04          | 294774    |
| 7  | 919.5746                   | 919.5753                  | -7.2E-04          | 242361    |
| 8  | 1047.6582                  | 1047.6590                 | -8.5E-04          | 210042    |
| 9  | 1175.7415                  | 1175.7428                 | -1.3E-03          | 127243    |
| 10 | 1303.8244                  | 1303.8265                 | -2.1E-03          | 61132     |
| 11 | 1431.9065                  | 1431.9102                 | -3.7E-03          | 24812     |
| 12 | 1559.9904                  | 1559.9940                 | -3.6E-03          | 8650      |

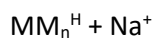

| n  | $m/z$ / Da<br>experimental | $m/z$ / Da<br>theoretical | $\Delta m/z$ / Da | intensity |
|----|----------------------------|---------------------------|-------------------|-----------|
| 2  | 267.1568                   | 267.1567                  | 1.3E-04           | 709       |
| 3  | 395.2403                   | 395.2404                  | -1.0E-04          | 16453     |
| 4  | 523.3239                   | 523.3241                  | -2.3E-04          | 46569     |
| 5  | 651.4075                   | 651.4079                  | -3.6E-04          | 34533     |
| 6  | 779.491                    | 779.4916                  | -5.9E-04          | 40819     |
| 7  | 907.5744                   | 907.5753                  | -9.2E-04          | 40246     |
| 8  | 1035.6579                  | 1035.6590                 | -1.1E-03          | 42173     |
| 9  | 1163.7414                  | 1163.7428                 | -1.4E-03          | 28933     |
| 10 | 1291.8244                  | 1291.8265                 | -2.1E-03          | 18688     |
| 11 | 1419.9065                  | 1419.9102                 | -3.7E-03          | 9589      |
| 12 | 1547.9903                  | 1547.9940                 | -3.7E-03          | 4098      |
| 13 | 1676.0735                  | 1676.0777                 | -4.2E-03          | 1496      |

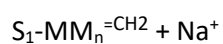

| n  | <i>m/z</i> / Da<br>experimental | <i>m/z</i> / Da<br>theoretical | $\Delta m/z$ / Da | intensity |
|----|---------------------------------|--------------------------------|-------------------|-----------|
| 2  | 397.2350                        | 397.2349                       | 1.0E-04           | 27019     |
| 3  | 525.3190                        | 525.3186                       | 3.7E-04           | 40510     |
| 4  | 653.4027                        | 653.4024                       | 3.4E-04           | 43093     |
| 5  | 781.4867                        | 781.4861                       | 6.1E-04           | 40455     |
| 6  | 909.5707                        | 909.5698                       | 8.8E-04           | 41588     |
| 7  | 1037.6552                       | 1037.6535                      | 1.7E-03           | 43402     |
| 8  | 1165.7388                       | 1165.7373                      | 1.5E-03           | 34815     |
| 9  | 1293.8227                       | 1293.8210                      | 1.7E-03           | 22421     |
| 10 | 1421.9053                       | 1421.9047                      | 5.6E-04           | 12791     |
| 11 | 1549.9901                       | 1549.9885                      | 1.6E-03           | 6255      |
| 12 | 1678.0731                       | 1678.0722                      | 9.0E-04           | 2903      |

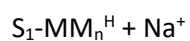

| n  | <i>m/z</i> / Da<br>experimental | <i>m/z</i> / Da<br>theoretical | $\Delta m/z$ / Da | intensity |
|----|---------------------------------|--------------------------------|-------------------|-----------|
| 2  | 385.2348                        | 385.2349                       | -1.0E-04          | 46644     |
| 3  | 513.3185                        | 513.3186                       | -1.3E-04          | 59076     |
| 4  | 641.4019                        | 641.4024                       | -4.6E-04          | 49278     |
| 5  | 769.4855                        | 769.4861                       | -5.9E-04          | 44869     |
| 6  | 897.5689                        | 897.5698                       | -9.2E-04          | 44715     |
| 7  | 1025.6524                       | 1025.6535                      | -1.1E-03          | 42558     |
| 8  | 1153.7357                       | 1153.7373                      | -1.6E-03          | 30332     |
| 9  | 1281.8184                       | 1281.8210                      | -2.6E-03          | 18299     |
| 10 | 1409.9005                       | 1409.9047                      | -4.2E-03          | 9131      |
| 11 | 1537.9843                       | 1537.9885                      | -4.2E-03          | 3997      |
| 12 | 1666.0663                       | 1666.0722                      | -5.9E-03          | 1433      |

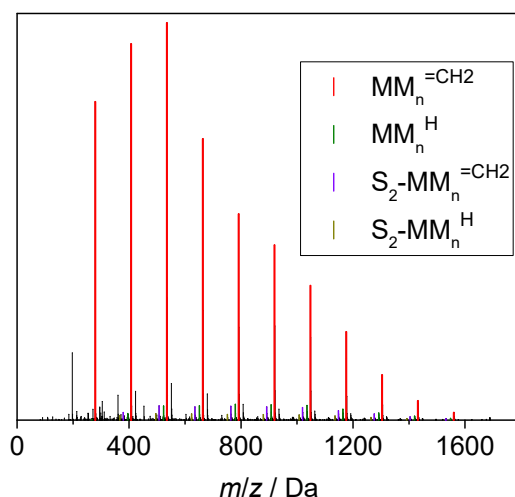

Figure S4: ESI-MS data of  $\beta$  scission products: batch polymerization at 130°C with  $c_{BA,0} = 2.06$  mol·L<sup>-1</sup> in dioxane ( $S_2$ : dioxane end group).

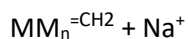

| n  | $m/z$ / Da<br>experimental | $m/z$ / Da<br>theoretical | $\Delta m/z$ / Da | intensity |
|----|----------------------------|---------------------------|-------------------|-----------|
| 2  | 279.157                    | 279.1567                  | 3.3E-04           | 391271    |
| 3  | 407.2408                   | 407.2404                  | 4.0E-04           | 462495    |
| 4  | 535.3245                   | 535.3241                  | 3.7E-04           | 488422    |
| 5  | 663.4081                   | 663.4079                  | 2.4E-04           | 345787    |
| 6  | 791.4919                   | 791.4916                  | 3.1E-04           | 253310    |
| 7  | 919.5758                   | 919.5753                  | 4.8E-04           | 215149    |
| 8  | 1047.6595                  | 1047.6590                 | 4.5E-04           | 165288    |
| 9  | 1175.7431                  | 1175.7428                 | 3.2E-04           | 108448    |
| 10 | 1303.8263                  | 1303.8265                 | -2.1E-04          | 55494     |
| 11 | 1431.9104                  | 1431.9102                 | 1.6E-04           | 23667     |
| 12 | 1559.9948                  | 1559.9940                 | 8.3E-04           | 9138      |

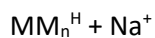

| n  | $m/z$ / Da<br>experimental | $m/z$ / Da<br>theoretical | $\Delta m/z$ / Da | intensity |
|----|----------------------------|---------------------------|-------------------|-----------|
| 2  | 267.1565                   | 267.1567                  | -1.7E-04          | 558       |
| 3  | 395.2403                   | 395.2404                  | -1.0E-04          | 8036      |
| 4  | 523.3239                   | 523.3241                  | -2.3E-04          | 17225     |
| 5  | 651.4077                   | 651.4079                  | -1.6E-04          | 17600     |
| 6  | 779.4912                   | 779.4916                  | -3.9E-04          | 19433     |
| 7  | 907.5745                   | 907.5753                  | -8.2E-04          | 18614     |
| 8  | 1035.6580                  | 1035.6590                 | -1.0E-03          | 18023     |
| 9  | 1163.7412                  | 1163.7428                 | -1.6E-03          | 13366     |
| 10 | 1291.8245                  | 1291.8265                 | -2.0E-03          | 8657      |
| 11 | 1419.9076                  | 1419.9102                 | -2.6E-03          | 4851      |
| 12 | 1547.9926                  | 1547.9940                 | -1.4E-03          | 2111      |

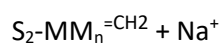

| n  | <i>m/z</i> / Da<br>experimental | <i>m/z</i> / Da<br>theoretical | $\Delta m/z$ / Da | intensity |
|----|---------------------------------|--------------------------------|-------------------|-----------|
| 2  | 379.2093                        | 379.2091                       | 2.0E-04           | 9398      |
| 3  | 507.2931                        | 507.2928                       | 2.7E-04           | 17464     |
| 4  | 635.3766                        | 635.3766                       | 4.1E-05           | 16127     |
| 5  | 763.4604                        | 763.4603                       | 1.1E-04           | 16967     |
| 6  | 891.5442                        | 891.5440                       | 1.8E-04           | 16107     |
| 7  | 1019.6283                       | 1019.6277                      | 5.5E-04           | 15392     |
| 8  | 1147.7116                       | 1147.7115                      | 1.2E-04           | 11410     |
| 9  | 1275.7945                       | 1275.7952                      | -7.1E-04          | 7458      |
| 10 | 1403.8780                       | 1403.8789                      | -9.4E-04          | 3915      |
| 11 | 1531.9630                       | 1531.9627                      | 3.3E-04           | 1749      |

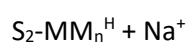

| n  | <i>m/z</i> / Da<br>experimental | <i>m/z</i> / Da<br>theoretical | $\Delta m/z$ / Da | intensity |
|----|---------------------------------|--------------------------------|-------------------|-----------|
| 2  | 367.2094                        | 367.2091                       | 3.0E-04           | 5683      |
| 3  | 495.2931                        | 495.2928                       | 2.7E-04           | 7904      |
| 4  | 623.3766                        | 623.3766                       | 4.1E-05           | 7497      |
| 5  | 751.4604                        | 751.4603                       | 1.1E-04           | 6864      |
| 6  | 879.5440                        | 879.5440                       | -1.9E-05          | 6774      |
| 7  | 1007.6276                       | 1007.6277                      | -1.5E-04          | 6294      |
| 8  | 1135.7112                       | 1135.7115                      | -2.8E-04          | 4913      |
| 9  | 1263.7942                       | 1263.7952                      | -1.0E-03          | 3273      |
| 10 | 1391.8779                       | 1391.8789                      | -1.0E-03          | 1838      |

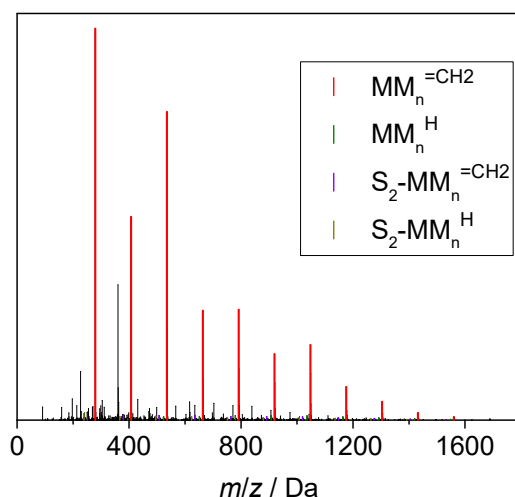

Figure S5: ESI-MS data of  $\beta$  scission products: batch polymerization at 120°C with  $c_{BA,0} = 2.92$  mol·L<sup>-1</sup> in dioxane ( $S_2$ : dioxane end group).

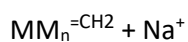

| n  | <i>m/z</i> / Da<br>experimental | <i>m/z</i> / Da<br>theoretical | $\Delta m/z$ / Da | intensity |
|----|---------------------------------|--------------------------------|-------------------|-----------|
| 2  | 279.1562                        | 279.1567                       | -4.7E-04          | 192560    |
| 3  | 407.2398                        | 407.2404                       | -6.0E-04          | 99913     |
| 4  | 535.3233                        | 535.3241                       | -8.3E-04          | 151569    |
| 5  | 663.4066                        | 663.4079                       | -1.3E-03          | 53809     |
| 6  | 791.4902                        | 791.4916                       | -1.4E-03          | 54280     |
| 7  | 919.5739                        | 919.5753                       | -1.4E-03          | 32481     |
| 8  | 1047.6577                       | 1047.6590                      | -1.3E-03          | 36991     |
| 9  | 1175.7406                       | 1175.7428                      | -2.2E-03          | 16319     |
| 10 | 1303.8237                       | 1303.8265                      | -2.8E-03          | 9034      |
| 11 | 1431.9066                       | 1431.9102                      | -3.6E-03          | 3587      |
| 12 | 1559.9918                       | 1559.9940                      | -2.2E-03          | 1479      |

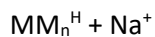

| n  | <i>m/z</i> / Da<br>experimental | <i>m/z</i> / Da<br>theoretical | $\Delta m/z$ / Da | intensity |
|----|---------------------------------|--------------------------------|-------------------|-----------|
| 3  | 395.2391                        | 395.2404                       | -1.3E-03          | 614       |
| 4  | 523.3226                        | 523.3241                       | -1.5E-03          | 1664      |
| 5  | 651.4059                        | 651.4079                       | -2.0E-03          | 1756      |
| 6  | 779.4896                        | 779.4916                       | -2.0E-03          | 2129      |
| 7  | 907.5729                        | 907.5753                       | -2.4E-03          | 2029      |
| 8  | 1035.6567                       | 1035.6590                      | -2.3E-03          | 2019      |
| 9  | 1163.7390                       | 1163.7428                      | -3.8E-03          | 1552      |
| 10 | 1291.8227                       | 1291.8265                      | -3.8E-03          | 1103      |
| 11 | 1419.9047                       | 1419.9102                      | -5.5E-03          | 621       |
| 12 | 1547.9893                       | 1547.9940                      | -4.7E-03          | 318       |

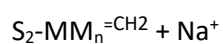

| n  | <i>m/z</i> / Da<br>experimental | <i>m/z</i> / Da<br>theoretical | $\Delta m/z$ / Da | intensity |
|----|---------------------------------|--------------------------------|-------------------|-----------|
| 1  | 251.1247                        | 251.1254                       | -6.7E-04          | 502       |
| 2  | 379.2086                        | 379.2091                       | -5.0E-04          | 2443      |
| 3  | 507.2918                        | 507.2928                       | -1.0E-03          | 2165      |
| 4  | 635.3757                        | 635.3766                       | -8.6E-04          | 2150      |
| 5  | 763.4585                        | 763.4603                       | -1.8E-03          | 1686      |
| 6  | 891.5417                        | 891.5440                       | -2.3E-03          | 1701      |
| 7  | 1019.6251                       | 1019.6277                      | -2.6E-03          | 1643      |
| 8  | 1147.7085                       | 1147.7115                      | -3.0E-03          | 1159      |
| 9  | 1275.7909                       | 1275.7952                      | -4.3E-03          | 768       |
| 10 | 1403.8751                       | 1403.8789                      | -3.8E-03          | 464       |
| 11 | 1531.9609                       | 1531.9627                      | -1.8E-03          | 241       |

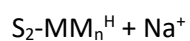

| n  | <i>m/z</i> / Da<br>experimental | <i>m/z</i> / Da<br>theoretical | $\Delta m/z$ / Da | intensity |
|----|---------------------------------|--------------------------------|-------------------|-----------|
| 1  | 239.1248                        | 239.1254                       | -5.7E-04          | 3234      |
| 2  | 367.2087                        | 367.2091                       | -4.0E-04          | 1724      |
| 3  | 495.2917                        | 495.2928                       | -1.1E-03          | 1848      |
| 4  | 623.3752                        | 623.3766                       | -1.4E-03          | 1561      |
| 5  | 751.4585                        | 751.4603                       | -1.8E-03          | 1264      |
| 6  | 879.5422                        | 879.5440                       | -1.8E-03          | 1215      |
| 7  | 1007.6264                       | 1007.6277                      | -1.3E-03          | 1120      |
| 8  | 1135.7094                       | 1135.7115                      | -2.1E-03          | 853       |
| 9  | 1263.7908                       | 1263.7952                      | -4.4E-03          | 549       |
| 10 | 1391.8752                       | 1391.8789                      | -3.7E-03          | 310       |



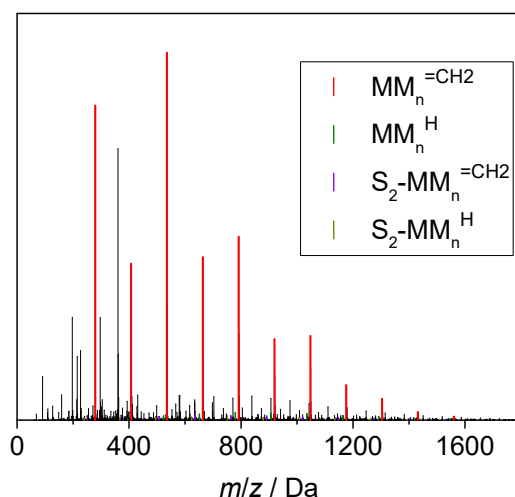

Figure S6: ESI-MS data of  $\beta$  scission products: batch polymerization at 120°C with  $c_{BA,0} = 3.69 \text{ mol}\cdot\text{L}^{-1}$  in dioxane ( $S_2$ : dioxane end group).



| n  | $m/z$ / Da<br>experimental | $m/z$ / Da<br>theoretical | $\Delta m/z$ / Da | intensity |
|----|----------------------------|---------------------------|-------------------|-----------|
| 2  | 279.1567                   | 279.1567                  | 3.0E-05           | 154718    |
| 3  | 407.2402                   | 407.2404                  | -2.0E-04          | 76861     |
| 4  | 535.3238                   | 535.3241                  | -3.3E-04          | 180612    |
| 5  | 663.4073                   | 663.4079                  | -5.6E-04          | 80100     |
| 6  | 791.4908                   | 791.4916                  | -7.9E-04          | 90155     |
| 7  | 919.5742                   | 919.5753                  | -1.1E-03          | 39812     |
| 8  | 1047.658                   | 1047.6590                 | -1.0E-03          | 41404     |
| 9  | 1175.7415                  | 1175.7428                 | -1.3E-03          | 17176     |
| 10 | 1303.8253                  | 1303.8265                 | -1.2E-03          | 10424     |
| 11 | 1431.9083                  | 1431.9102                 | -1.9E-03          | 3881      |
| 12 | 1559.9919                  | 1559.9940                 | -2.1E-03          | 1694      |



| n  | $m/z$ / Da<br>experimental | $m/z$ / Da<br>theoretical | $\Delta m/z$ / Da | intensity |
|----|----------------------------|---------------------------|-------------------|-----------|
| 3  | 395.2397                   | 395.2404                  | -7.0E-04          | 625       |
| 4  | 523.3236                   | 523.3241                  | -5.3E-04          | 2098      |
| 5  | 651.4073                   | 651.4079                  | -5.6E-04          | 2863      |
| 6  | 779.4906                   | 779.4916                  | -9.9E-04          | 3756      |
| 7  | 907.5732                   | 907.5753                  | -2.1E-03          | 3392      |
| 8  | 1035.6571                  | 1035.6590                 | -1.9E-03          | 3073      |
| 9  | 1163.7406                  | 1163.7428                 | -2.2E-03          | 2284      |
| 10 | 1291.8244                  | 1291.8265                 | -2.1E-03          | 1520      |
| 11 | 1419.9068                  | 1419.9102                 | -3.4E-03          | 817       |
| 12 | 1547.9911                  | 1547.9940                 | -2.9E-03          | 454       |



| n  | m/z / Da<br>experimental | m/z / Da<br>theoretical | $\Delta m/z / Da$ | intensity |
|----|--------------------------|-------------------------|-------------------|-----------|
| 1  | 251.1255                 | 251.1254                | 1.3E-04           | 251       |
| 2  | 379.2088                 | 379.2091                | -3.0E-04          | 1099      |
| 3  | 507.2925                 | 507.2928                | -3.3E-04          | 1735      |
| 4  | 635.3765                 | 635.3766                | -5.9E-05          | 2402      |
| 5  | 763.4589                 | 763.4603                | -1.4E-03          | 2039      |
| 6  | 891.5423                 | 891.5440                | -1.7E-03          | 1939      |
| 7  | 1019.6247                | 1019.6277               | -3.0E-03          | 1738      |
| 8  | 1147.7096                | 1147.7115               | -1.9E-03          | 1289      |
| 9  | 1275.7926                | 1275.7952               | -2.6E-03          | 900       |
| 10 | 1403.8763                | 1403.8789               | -2.6E-03          | 544       |
| 11 | 1531.9603                | 1531.9627               | -2.4E-03          | 283       |



| n  | m/z / Da<br>experimental | m/z / Da<br>theoretical | $\Delta m/z / Da$ | intensity |
|----|--------------------------|-------------------------|-------------------|-----------|
| 1  | 239.1251                 | 239.1254                | -2.7E-04          | 896       |
| 2  | 367.209                  | 367.2091                | -1.0E-04          | 871       |
| 3  | 495.292                  | 495.2928                | -8.3E-04          | 1357      |
| 4  | 623.3761                 | 623.3766                | -4.6E-04          | 1437      |
| 5  | 751.4596                 | 751.4603                | -6.9E-04          | 1348      |
| 6  | 879.5428                 | 879.5440                | -1.2E-03          | 1320      |
| 7  | 1007.6271                | 1007.6277               | -6.5E-04          | 1136      |
| 8  | 1135.7099                | 1135.7115               | -1.6E-03          | 854       |
| 9  | 1263.7771                | 1263.7952               | -1.8E-02          | 767       |
| 10 | 1391.8779                | 1391.8789               | -1.0E-03          | 328       |

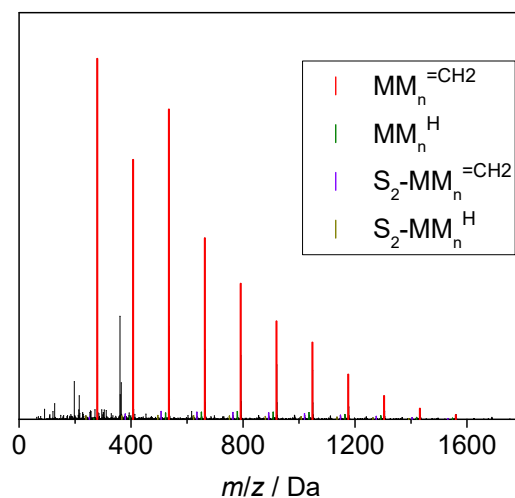

Figure S7: ESI-MS data of  $\beta$  scission products: batch polymerization at 130°C with  $c_{BA,0} = 2.92 \text{ mol}\cdot\text{L}^{-1}$  in dioxane ( $S_2$ : dioxane end group).

$MM_n^{=CH_2} + Na^+$

| n  | $m/z$ / Da<br>experimental | $m/z$ / Da<br>theoretical | $\Delta m/z$ / Da | intensity |
|----|----------------------------|---------------------------|-------------------|-----------|
| 2  | 279.1567                   | 279.1567                  | 3.0E-05           | 150724    |
| 3  | 407.2404                   | 407.2404                  | 0.0E+00           | 108442    |
| 4  | 535.3239                   | 535.3241                  | -2.3E-04          | 129539    |
| 5  | 663.4073                   | 663.4079                  | -5.6E-04          | 75672     |
| 6  | 791.4910                   | 791.4916                  | -5.9E-04          | 56691     |
| 7  | 919.5747                   | 919.5753                  | -6.2E-04          | 40972     |
| 8  | 1047.6583                  | 1047.6590                 | -7.5E-04          | 32089     |
| 9  | 1175.7414                  | 1175.7428                 | -1.4E-03          | 18723     |
| 10 | 1303.8246                  | 1303.8265                 | -1.9E-03          | 9742      |
| 11 | 1431.9078                  | 1431.9102                 | -2.4E-03          | 4454      |
| 12 | 1559.9929                  | 1559.9940                 | -1.1E-03          | 1761      |

$MM_n^H + Na^+$

| n  | $m/z$ / Da<br>experimental | $m/z$ / Da<br>theoretical | $\Delta m/z$ / Da | intensity |
|----|----------------------------|---------------------------|-------------------|-----------|
| 2  | 267.1573                   | 267.1567                  | 6.3E-04           | 262       |
| 3  | 395.2399                   | 395.2404                  | -5.0E-04          | 970       |
| 4  | 523.3237                   | 523.3241                  | -4.3E-04          | 2618      |
| 5  | 651.4071                   | 651.4079                  | -7.6E-04          | 2912      |
| 6  | 779.4904                   | 779.4916                  | -1.2E-03          | 3237      |
| 7  | 907.5735                   | 907.5753                  | -1.8E-03          | 2924      |
| 8  | 1035.6572                  | 1035.6590                 | -1.8E-03          | 2719      |
| 9  | 1163.7402                  | 1163.7428                 | -2.6E-03          | 1977      |
| 10 | 1291.8225                  | 1291.8265                 | -4.0E-03          | 1447      |
| 11 | 1419.9063                  | 1419.9102                 | -3.9E-03          | 748       |

|    |           |           |          |     |
|----|-----------|-----------|----------|-----|
| 12 | 1547.9889 | 1547.9940 | -5.1E-03 | 411 |
|----|-----------|-----------|----------|-----|

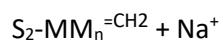

| n  | m/z / Da<br>experimental | m/z / Da<br>theoretical | $\Delta m/z / Da$ | intensity |
|----|--------------------------|-------------------------|-------------------|-----------|
| 1  | 251.1251                 | 251.1254                | -2.7E-04          | 834       |
| 2  | 379.2092                 | 379.2091                | 1.0E-04           | 2188      |
| 3  | 507.2926                 | 507.2928                | -2.3E-04          | 3288      |
| 4  | 635.3759                 | 635.3766                | -6.6E-04          | 2945      |
| 5  | 763.4596                 | 763.4603                | -6.9E-04          | 2848      |
| 6  | 891.5431                 | 891.5440                | -9.2E-04          | 2626      |
| 7  | 1019.6266                | 1019.6277               | -1.1E-03          | 2379      |
| 8  | 1147.7103                | 1147.7115               | -1.2E-03          | 1696      |
| 9  | 1275.7924                | 1275.7952               | -2.8E-03          | 1191      |
| 10 | 1403.8751                | 1403.8789               | -3.8E-03          | 668       |
| 11 | 1531.9591                | 1531.9627               | -3.6E-03          | 311       |

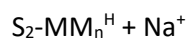

| n  | m/z / Da<br>experimental | m/z / Da<br>theoretical | $\Delta m/z / Da$ | intensity |
|----|--------------------------|-------------------------|-------------------|-----------|
| 1  | 239.1252                 | 239.1254                | -1.7E-04          | 1353      |
| 2  | 367.2092                 | 367.2091                | 1.0E-04           | 1337      |
| 3  | 495.2927                 | 495.2928                | -1.3E-04          | 1610      |
| 4  | 623.3760                 | 623.3766                | -5.6E-04          | 1430      |
| 5  | 751.4597                 | 751.4603                | -5.9E-04          | 1354      |
| 6  | 879.5433                 | 879.5440                | -7.2E-04          | 1168      |
| 7  | 1007.6273                | 1007.6277               | -4.5E-04          | 1086      |
| 8  | 1135.7104                | 1135.7115               | -1.1E-03          | 848       |
| 9  | 1263.7920                | 1263.7952               | -3.2E-03          | 524       |
| 10 | 1391.8730                | 1391.8789               | -5.9E-03          | 292       |

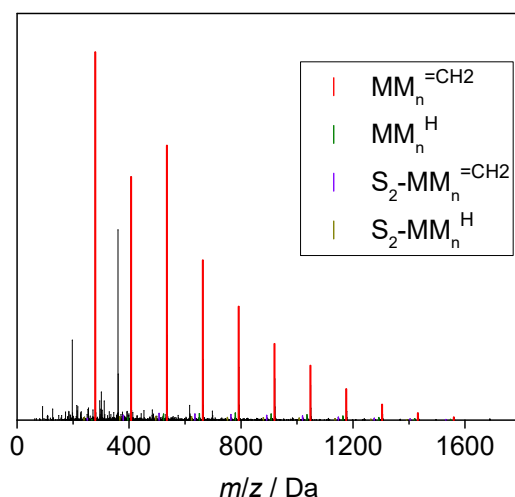

Figure S8: ESI-MS data of  $\beta$  scission products: batch polymerization at 130°C with  $c_{BA,0} = 3.69$  mol·L<sup>-1</sup> in dioxane ( $S_2$ : dioxane end group).



| n  | $m/z$ / Da<br>experimental | $m/z$ / Da<br>theoretical | $\Delta m/z$ / Da | intensity |
|----|----------------------------|---------------------------|-------------------|-----------|
| 2  | 279.1561                   | 279.1567                  | -5.7E-04          | 126665    |
| 3  | 407.2395                   | 407.2404                  | -9.0E-04          | 83707     |
| 4  | 535.3228                   | 535.3241                  | -1.3E-03          | 94514     |
| 5  | 663.4063                   | 663.4079                  | -1.6E-03          | 55015     |
| 6  | 791.4897                   | 791.4916                  | -1.9E-03          | 39079     |
| 7  | 919.5732                   | 919.5753                  | -2.1E-03          | 26225     |
| 8  | 1047.657                   | 1047.6590                 | -2.0E-03          | 18745     |
| 9  | 1175.7406                  | 1175.7428                 | -2.2E-03          | 10663     |
| 10 | 1303.824                   | 1303.8265                 | -2.5E-03          | 5336      |
| 11 | 1431.9076                  | 1431.9102                 | -2.6E-03          | 2387      |
| 12 | 1559.9906                  | 1559.9940                 | -3.4E-03          | 938       |

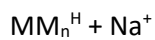

| n  | $m/z$ / Da<br>experimental | $m/z$ / Da<br>theoretical | $\Delta m/z$ / Da | intensity |
|----|----------------------------|---------------------------|-------------------|-----------|
| 2  | 267.1559                   | 267.1567                  | -7.7E-04          | 203       |
| 3  | 395.2397                   | 395.2404                  | -7.0E-04          | 896       |
| 4  | 523.3225                   | 523.3241                  | -1.6E-03          | 2067      |
| 5  | 651.4063                   | 651.4079                  | -1.6E-03          | 2218      |
| 6  | 779.4891                   | 779.4916                  | -2.5E-03          | 2432      |
| 7  | 907.5723                   | 907.5753                  | -3.0E-03          | 2069      |
| 8  | 1035.6555                  | 1035.6590                 | -3.5E-03          | 1793      |
| 9  | 1163.7396                  | 1163.7428                 | -3.2E-03          | 1335      |
| 10 | 1291.8237                  | 1291.8265                 | -2.8E-03          | 873       |
| 11 | 1419.9054                  | 1419.9102                 | -4.8E-03          | 469       |
| 12 | 1547.9881                  | 1547.9940                 | -5.9E-03          | 242       |

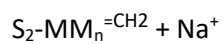

| n  | m/z / Da<br>experimental | m/z / Da<br>theoretical | $\Delta$ m/z / Da | intensity |
|----|--------------------------|-------------------------|-------------------|-----------|
| 1  | 251.1247                 | 251.1254                | -6.7E-04          | 577       |
| 2  | 379.2083                 | 379.2091                | -8.0E-04          | 1657      |
| 3  | 507.2916                 | 507.2928                | -1.2E-03          | 2288      |
| 4  | 635.3747                 | 635.3766                | -1.9E-03          | 2058      |
| 5  | 763.4584                 | 763.4603                | -1.9E-03          | 1902      |
| 6  | 891.5415                 | 891.5440                | -2.5E-03          | 1639      |
| 7  | 1019.6248                | 1019.6277               | -2.9E-03          | 1416      |
| 8  | 1147.7084                | 1147.7115               | -3.1E-03          | 990       |
| 9  | 1275.7929                | 1275.7952               | -2.3E-03          | 634       |
| 10 | 1403.8758                | 1403.8789               | -3.1E-03          | 370       |
| 11 | 1531.9598                | 1531.9627               | -2.9E-03          | 181       |

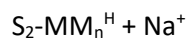

| n  | m/z / Da<br>experimental | m/z / Da<br>theoretical | $\Delta$ m/z / Da | intensity |
|----|--------------------------|-------------------------|-------------------|-----------|
| 1  | 239.1246                 | 239.1254                | -7.7E-04          | 856       |
| 2  | 367.2082                 | 367.2091                | -9.0E-04          | 1144      |
| 3  | 495.2917                 | 495.2928                | -1.1E-03          | 1271      |
| 4  | 623.3745                 | 623.3766                | -2.1E-03          | 1097      |
| 5  | 751.459                  | 751.4603                | -1.3E-03          | 908       |
| 6  | 879.5419                 | 879.5440                | -2.1E-03          | 831       |
| 7  | 1007.6259                | 1007.6277               | -1.8E-03          | 688       |
| 8  | 1135.709                 | 1135.7115               | -2.5E-03          | 465       |
| 9  | 1263.7929                | 1263.7952               | -2.3E-03          | 296       |
| 10 | 1391.8754                | 1391.8789               | -3.5E-03          | 172       |

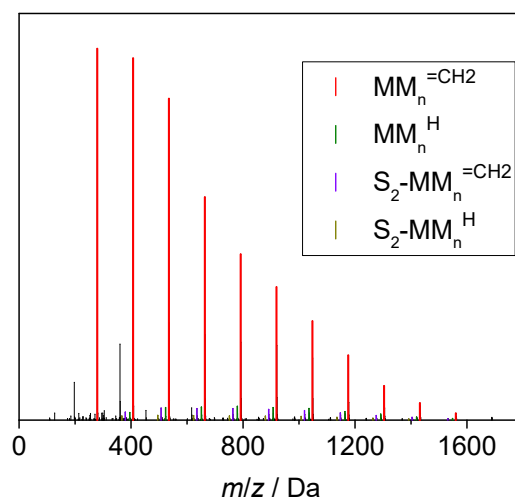

Figure S9: ESI-MS data of  $\beta$  scission products: batch polymerization at 140°C with  $c_{BA,0} = 2.92 \text{ mol}\cdot\text{L}^{-1}$  in dioxane ( $S_2$ : dioxane end group).



| n  | $m/z$ / Da<br>experimental | $m/z$ / Da<br>theoretical | $\Delta m/z$ / Da | intensity |
|----|----------------------------|---------------------------|-------------------|-----------|
| 2  | 279.1558                   | 279.1567                  | -8.7E-04          | 45667     |
| 3  | 407.2393                   | 407.2404                  | -1.1E-03          | 44493     |
| 4  | 535.3226                   | 535.3241                  | -1.5E-03          | 39521     |
| 5  | 663.4058                   | 663.4079                  | -2.1E-03          | 27413     |
| 6  | 791.4894                   | 791.4916                  | -2.2E-03          | 20387     |
| 7  | 919.5730                   | 919.5753                  | -2.3E-03          | 16363     |
| 8  | 1047.6565                  | 1047.6590                 | -2.5E-03          | 12174     |
| 9  | 1175.7395                  | 1175.7428                 | -3.3E-03          | 7970      |
| 10 | 1303.8221                  | 1303.8265                 | -4.4E-03          | 4199      |
| 11 | 1431.9053                  | 1431.9102                 | -4.9E-03          | 2091      |
| 12 | 1559.9893                  | 1559.9940                 | -4.7E-03          | 836       |



| n  | $m/z$ / Da<br>experimental | $m/z$ / Da<br>theoretical | $\Delta m/z$ / Da | intensity |
|----|----------------------------|---------------------------|-------------------|-----------|
| 3  | 395.2391                   | 395.2404                  | -1.3E-03          | 927       |
| 4  | 523.3226                   | 523.3241                  | -1.5E-03          | 1536      |
| 5  | 651.4057                   | 651.4079                  | -2.2E-03          | 1601      |
| 6  | 779.4889                   | 779.4916                  | -2.7E-03          | 1705      |
| 7  | 907.5723                   | 907.5753                  | -3.0E-03          | 1537      |
| 8  | 1035.6561                  | 1035.6590                 | -2.9E-03          | 1433      |
| 9  | 1163.7387                  | 1163.7428                 | -4.1E-03          | 1043      |
| 10 | 1291.8214                  | 1291.8265                 | -5.1E-03          | 736       |
| 11 | 1419.9040                  | 1419.9102                 | -6.2E-03          | 384       |
| 12 | 1547.9882                  | 1547.9940                 | -5.8E-03          | 200       |



| n  | <i>m/z</i> / Da<br>experimental | <i>m/z</i> / Da<br>theoretical | $\Delta m/z$ / Da | intensity |
|----|---------------------------------|--------------------------------|-------------------|-----------|
| 2  | 379.2083                        | 379.2091                       | -8.0E-04          | 975       |
| 3  | 507.2914                        | 507.2928                       | -1.4E-03          | 1475      |
| 4  | 635.3747                        | 635.3766                       | -1.9E-03          | 1421      |
| 5  | 763.4580                        | 763.4603                       | -2.3E-03          | 1419      |
| 6  | 891.5419                        | 891.5440                       | -2.1E-03          | 1322      |
| 7  | 1019.6251                       | 1019.6277                      | -2.6E-03          | 1178      |
| 8  | 1147.7081                       | 1147.7115                      | -3.4E-03          | 872       |
| 9  | 1275.7915                       | 1275.7952                      | -3.7E-03          | 560       |
| 10 | 1403.8741                       | 1403.8789                      | -4.8E-03          | 341       |
| 11 | 1531.9586                       | 1531.9627                      | -4.1E-03          | 152       |



| n  | <i>m/z</i> / Da<br>experimental | <i>m/z</i> / Da<br>theoretical | $\Delta m/z$ / Da | intensity |
|----|---------------------------------|--------------------------------|-------------------|-----------|
| 2  | 367.2080                        | 367.2091                       | -1.1E-03          | 492       |
| 3  | 495.2912                        | 495.2928                       | -1.6E-03          | 575       |
| 4  | 623.3745                        | 623.3766                       | -2.1E-03          | 545       |
| 5  | 751.4577                        | 751.4603                       | -2.6E-03          | 510       |
| 6  | 879.5420                        | 879.5440                       | -2.0E-03          | 486       |
| 7  | 1007.6251                       | 1007.6277                      | -2.6E-03          | 454       |
| 8  | 1135.7090                       | 1135.7115                      | -2.5E-03          | 337       |
| 9  | 1263.7915                       | 1263.7952                      | -3.7E-03          | 229       |
| 10 | 1391.8735                       | 1391.8789                      | -5.4E-03          | 126       |



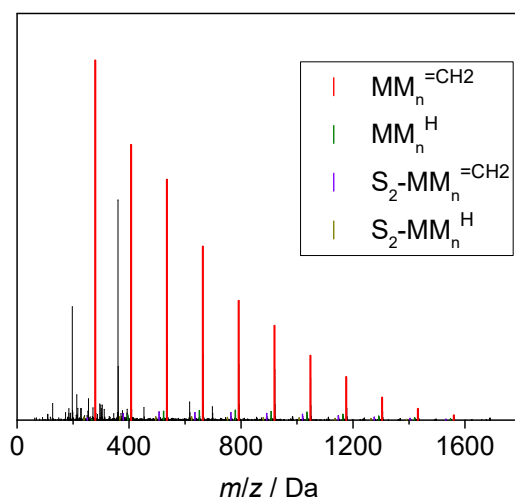

Figure S10: ESI-MS data of  $\beta$  scission products: batch polymerization at 140°C with  $c_{BA,0} = 3.69$  mol·L<sup>-1</sup> in dioxane ( $S_2$ : dioxane end group).



| n  | $m/z$ / Da<br>experimental | $m/z$ / Da<br>theoretical | $\Delta m/z$ / Da | intensity |
|----|----------------------------|---------------------------|-------------------|-----------|
| 2  | 279.1558                   | 279.1567                  | -8.7E-04          | 150376    |
| 3  | 407.2391                   | 407.2404                  | -1.3E-03          | 115060    |
| 4  | 535.3224                   | 535.3241                  | -1.7E-03          | 100496    |
| 5  | 663.4058                   | 663.4079                  | -2.1E-03          | 72539     |
| 6  | 791.4891                   | 791.4916                  | -2.5E-03          | 49879     |
| 7  | 919.5724                   | 919.5753                  | -2.9E-03          | 39468     |
| 8  | 1047.656                   | 1047.6590                 | -3.0E-03          | 26957     |
| 9  | 1175.7396                  | 1175.7428                 | -3.2E-03          | 17989     |
| 10 | 1303.8232                  | 1303.8265                 | -3.3E-03          | 9417      |
| 11 | 1431.9059                  | 1431.9102                 | -4.3E-03          | 4720      |
| 12 | 1559.9895                  | 1559.9940                 | -4.5E-03          | 1976      |



| n  | $m/z$ / Da<br>experimental | $m/z$ / Da<br>theoretical | $\Delta m/z$ / Da | intensity |
|----|----------------------------|---------------------------|-------------------|-----------|
| 2  | 267.1561                   | 267.1567                  | -5.7E-04          | 319       |
| 3  | 395.2391                   | 395.2404                  | -1.3E-03          | 2090      |
| 4  | 523.3223                   | 523.3241                  | -1.8E-03          | 3657      |
| 5  | 651.4055                   | 651.4079                  | -2.4E-03          | 3925      |
| 6  | 779.4886                   | 779.4916                  | -3.0E-03          | 4094      |
| 7  | 907.5718                   | 907.5753                  | -3.5E-03          | 3574      |
| 8  | 1035.6547                  | 1035.6590                 | -4.3E-03          | 3276      |
| 9  | 1163.7384                  | 1163.7428                 | -4.4E-03          | 2421      |
| 10 | 1291.8221                  | 1291.8265                 | -4.4E-03          | 1659      |
| 11 | 1419.9046                  | 1419.9102                 | -5.6E-03          | 939       |
| 12 | 1547.9877                  | 1547.9940                 | -6.3E-03          | 492       |



| n  | <i>m/z</i> / Da<br>experimental | <i>m/z</i> / Da<br>theoretical | $\Delta m/z$ / Da | intensity |
|----|---------------------------------|--------------------------------|-------------------|-----------|
| 1  | 251.1245                        | 251.1254                       | -8.7E-04          | 803       |
| 2  | 379.2079                        | 379.2091                       | -1.2E-03          | 2642      |
| 3  | 507.2911                        | 507.2928                       | -1.7E-03          | 3349      |
| 4  | 635.3744                        | 635.3766                       | -2.2E-03          | 3065      |
| 5  | 763.4577                        | 763.4603                       | -2.6E-03          | 3099      |
| 6  | 891.5407                        | 891.5440                       | -3.3E-03          | 2779      |
| 7  | 1019.6242                       | 1019.6277                      | -3.5E-03          | 2414      |
| 8  | 1147.7078                       | 1147.7115                      | -3.7E-03          | 1782      |
| 9  | 1275.7918                       | 1275.7952                      | -3.4E-03          | 1202      |
| 10 | 1403.8749                       | 1403.8789                      | -4.0E-03          | 718       |
| 11 | 1531.958                        | 1531.9627                      | -4.7E-03          | 357       |

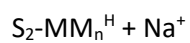

| n  | <i>m/z</i> / Da<br>experimental | <i>m/z</i> / Da<br>theoretical | $\Delta m/z$ / Da | intensity |
|----|---------------------------------|--------------------------------|-------------------|-----------|
| 1  | 239.1246                        | 239.1254                       | -7.7E-04          | 1194      |
| 2  | 367.2079                        | 367.2091                       | -1.2E-03          | 1305      |
| 3  | 495.2909                        | 495.2928                       | -1.9E-03          | 1320      |
| 4  | 623.3744                        | 623.3766                       | -2.2E-03          | 1286      |
| 5  | 751.4578                        | 751.4603                       | -2.5E-03          | 1100      |
| 6  | 879.5412                        | 879.5440                       | -2.8E-03          | 1013      |
| 7  | 1007.6244                       | 1007.6277                      | -3.3E-03          | 886       |
| 8  | 1135.7082                       | 1135.7115                      | -3.3E-03          | 695       |
| 9  | 1263.7919                       | 1263.7952                      | -3.3E-03          | 466       |
| 10 | 1391.8741                       | 1391.8789                      | -4.8E-03          | 282       |

**Figures S11 – S16 give the following NMR spectra of  $\text{MM}_3=\text{CH}_2$**

$^1\text{H}$  spectrum (600 MHz)

$^{13}\text{C}\{^1\text{H}\}$  spectrum (150 MHz)

$^{13}\text{C}$ -DEPT135 spectrum (150 MHz)

$^1\text{H}, ^1\text{H}$ -COSY (DQF-COSY, 600 MHz)

$^1\text{H}, ^{13}\text{C}$ -HSQC (600 MHz)

$^1\text{H}, ^{13}\text{C}$ -HMBC (600 MHz)

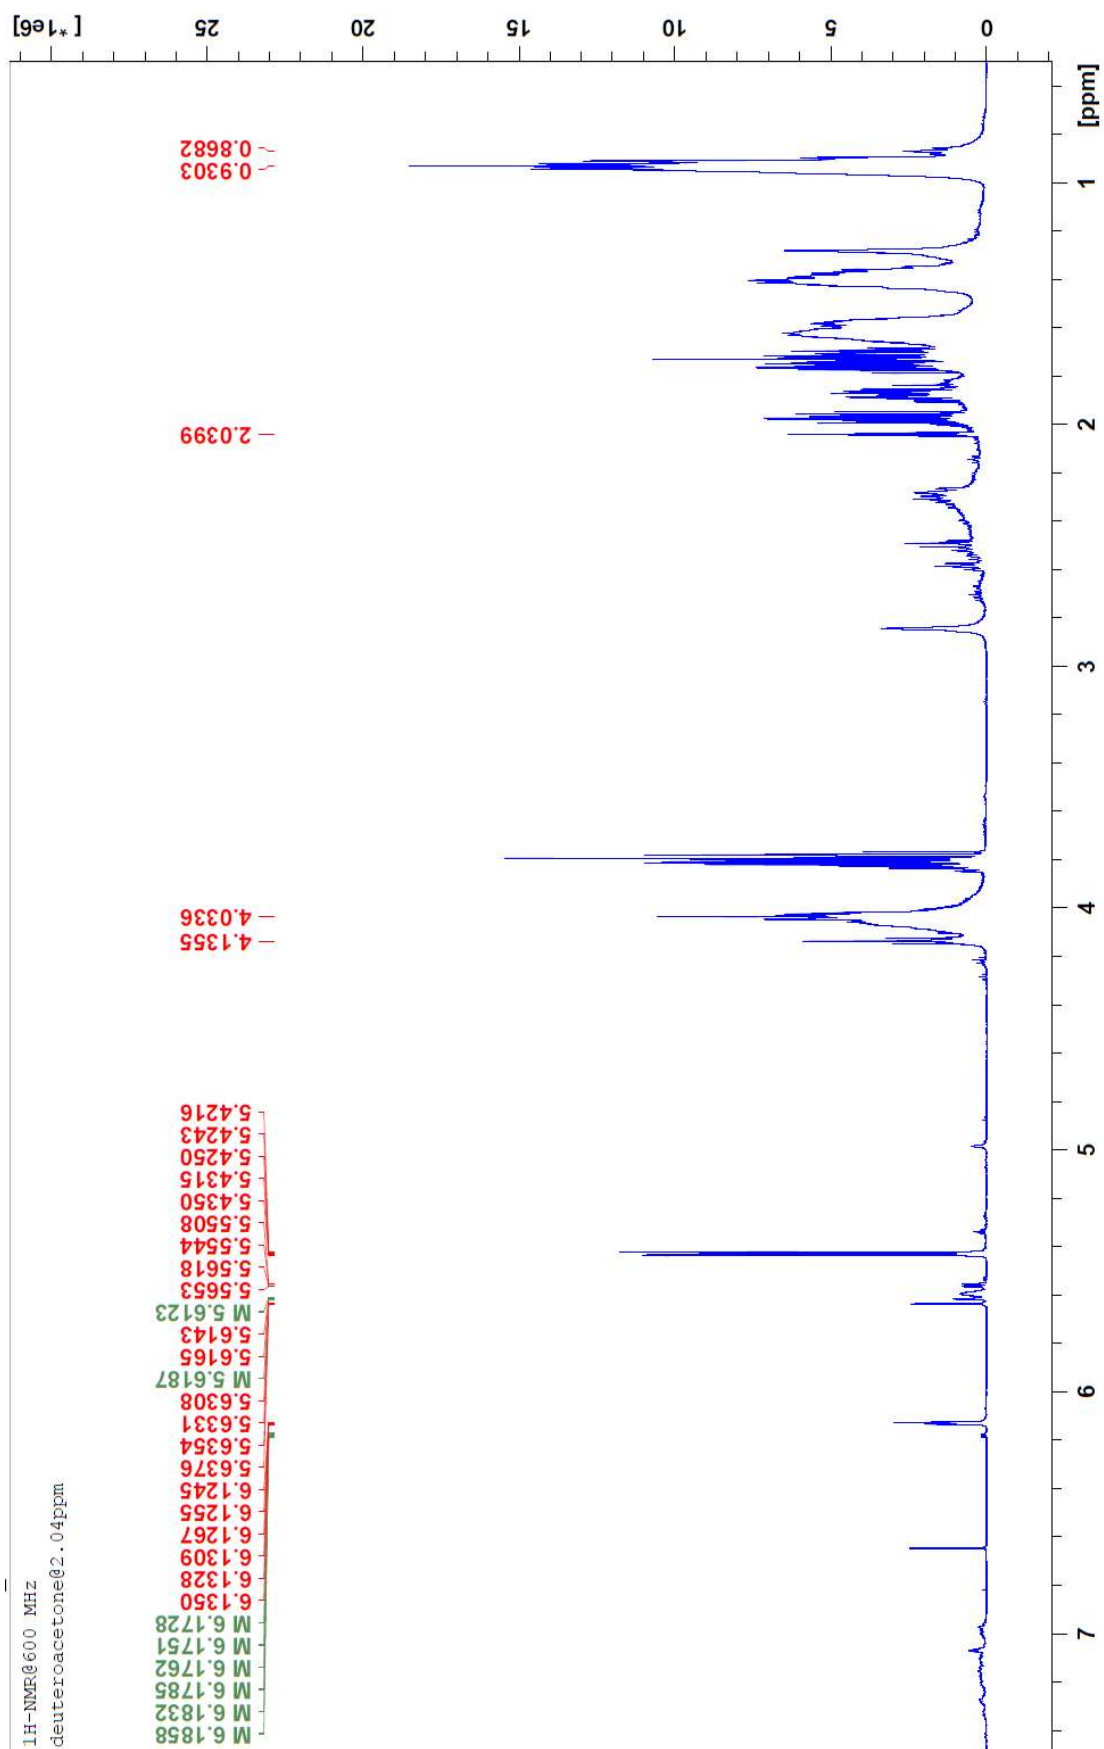

Figure S11:  $^1\text{H}$  spectrum of the unsaturated trimer ( $\text{MM}_3=\text{CH}_2$ ) (600 MHz).

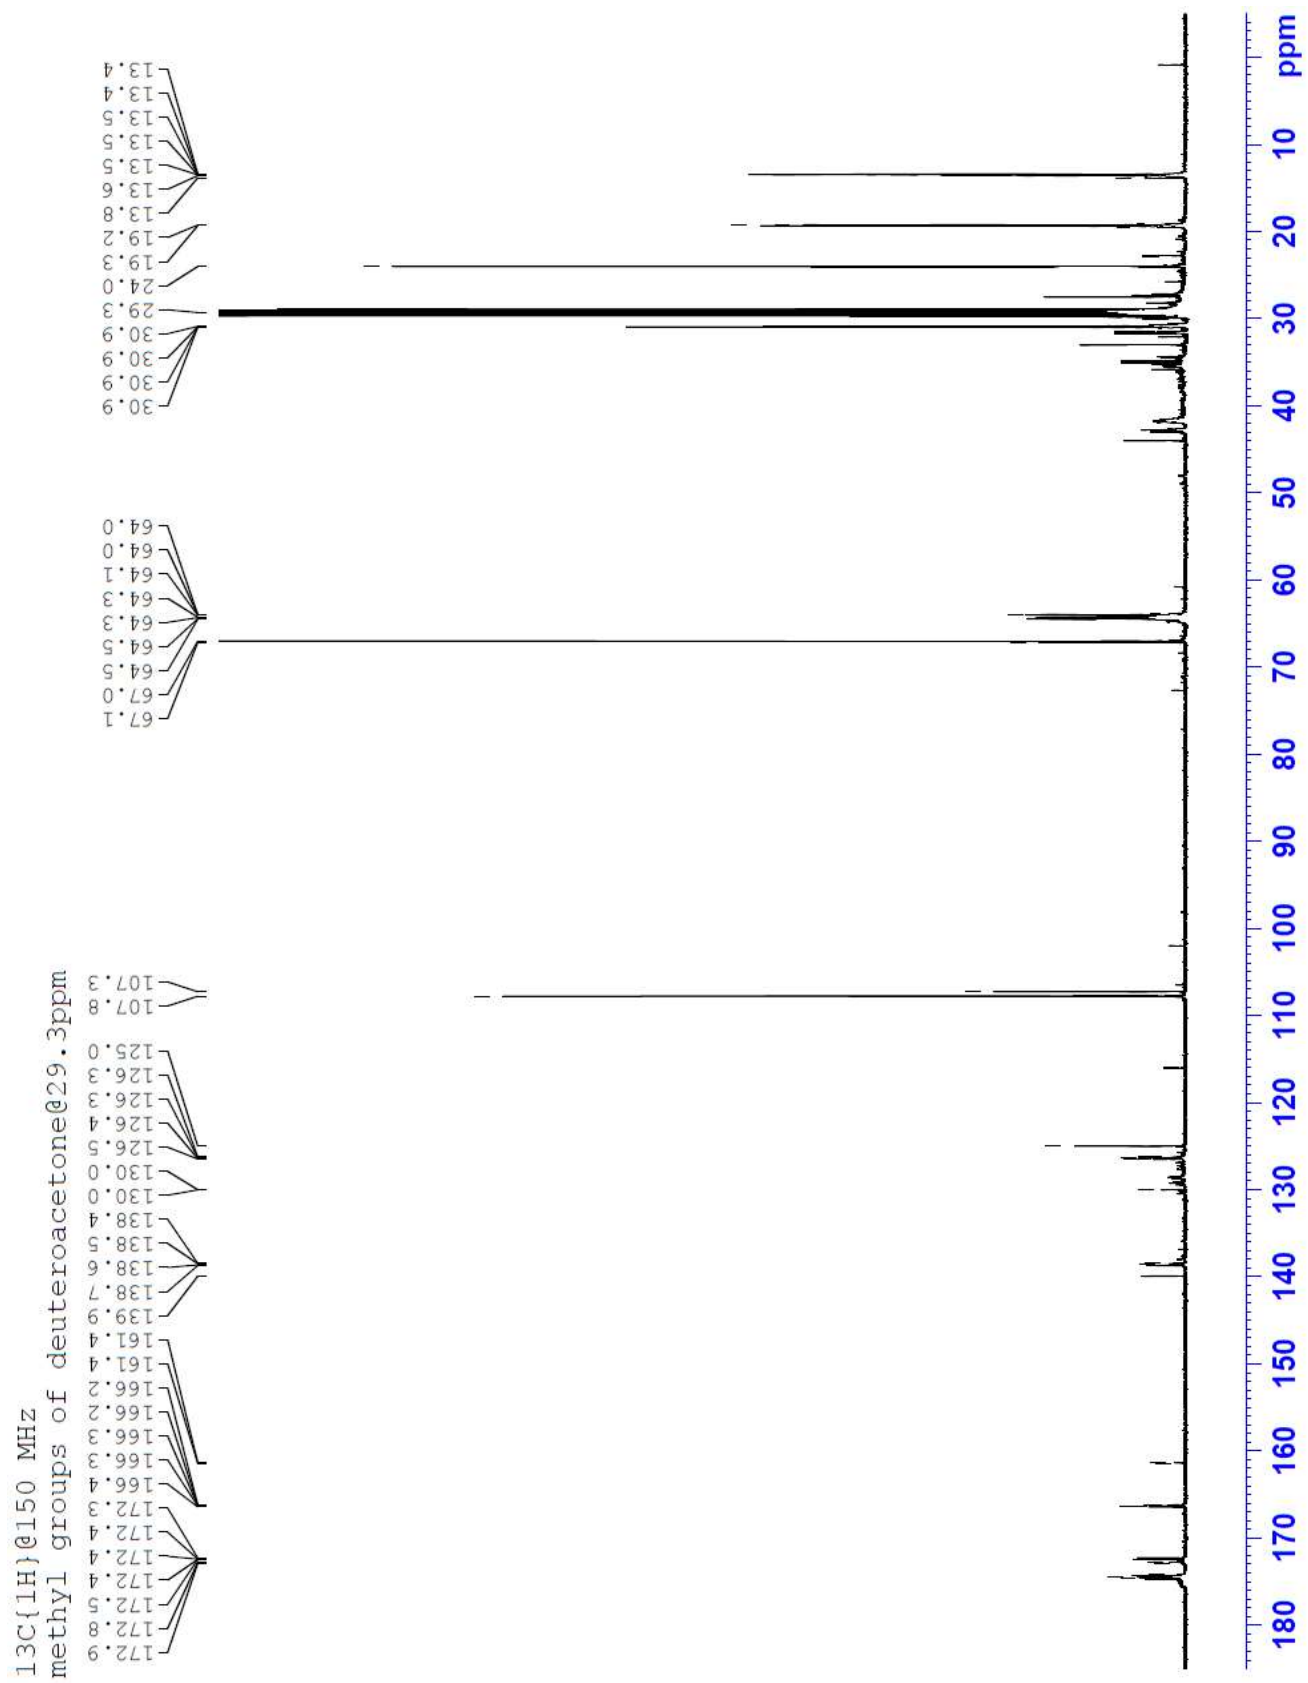

Figure S12:  $^{13}\text{C}\{^1\text{H}\}$  spectrum of  $\text{MM}_3=\text{CH}_2$  (150 MHz).

13C-DEPT135-sp@150 MHz

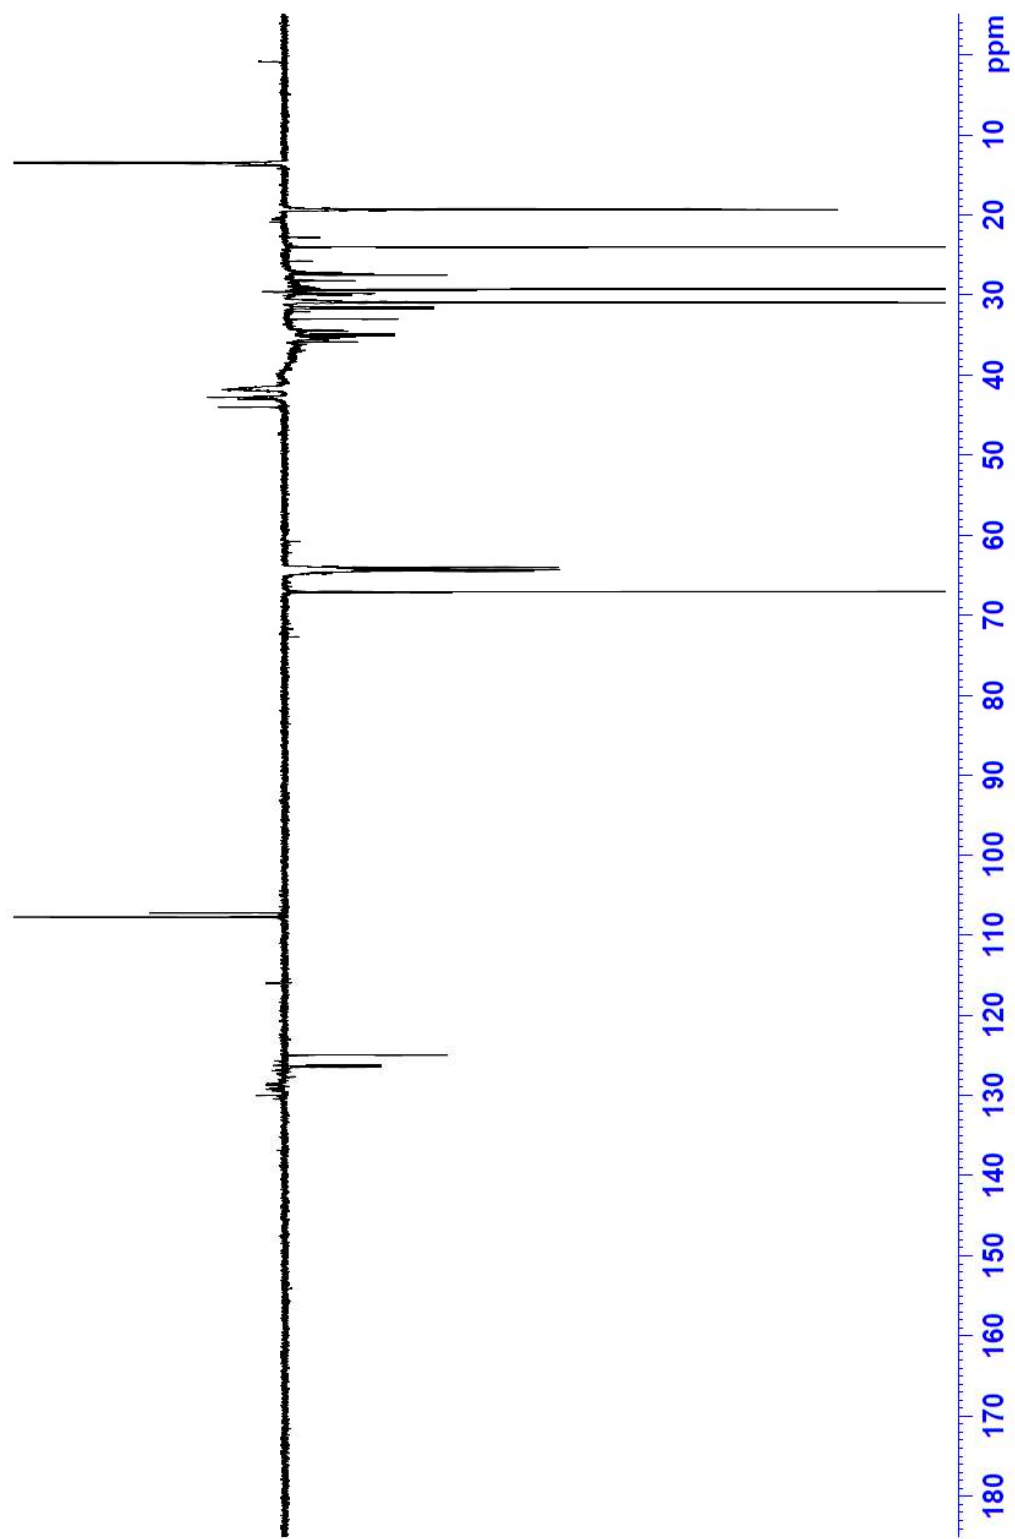

Figure S13:  $^{13}\text{C}$ -DEPT135 spectrum of  $\text{MM}_3=\text{CH}_2$  (150 MHz).

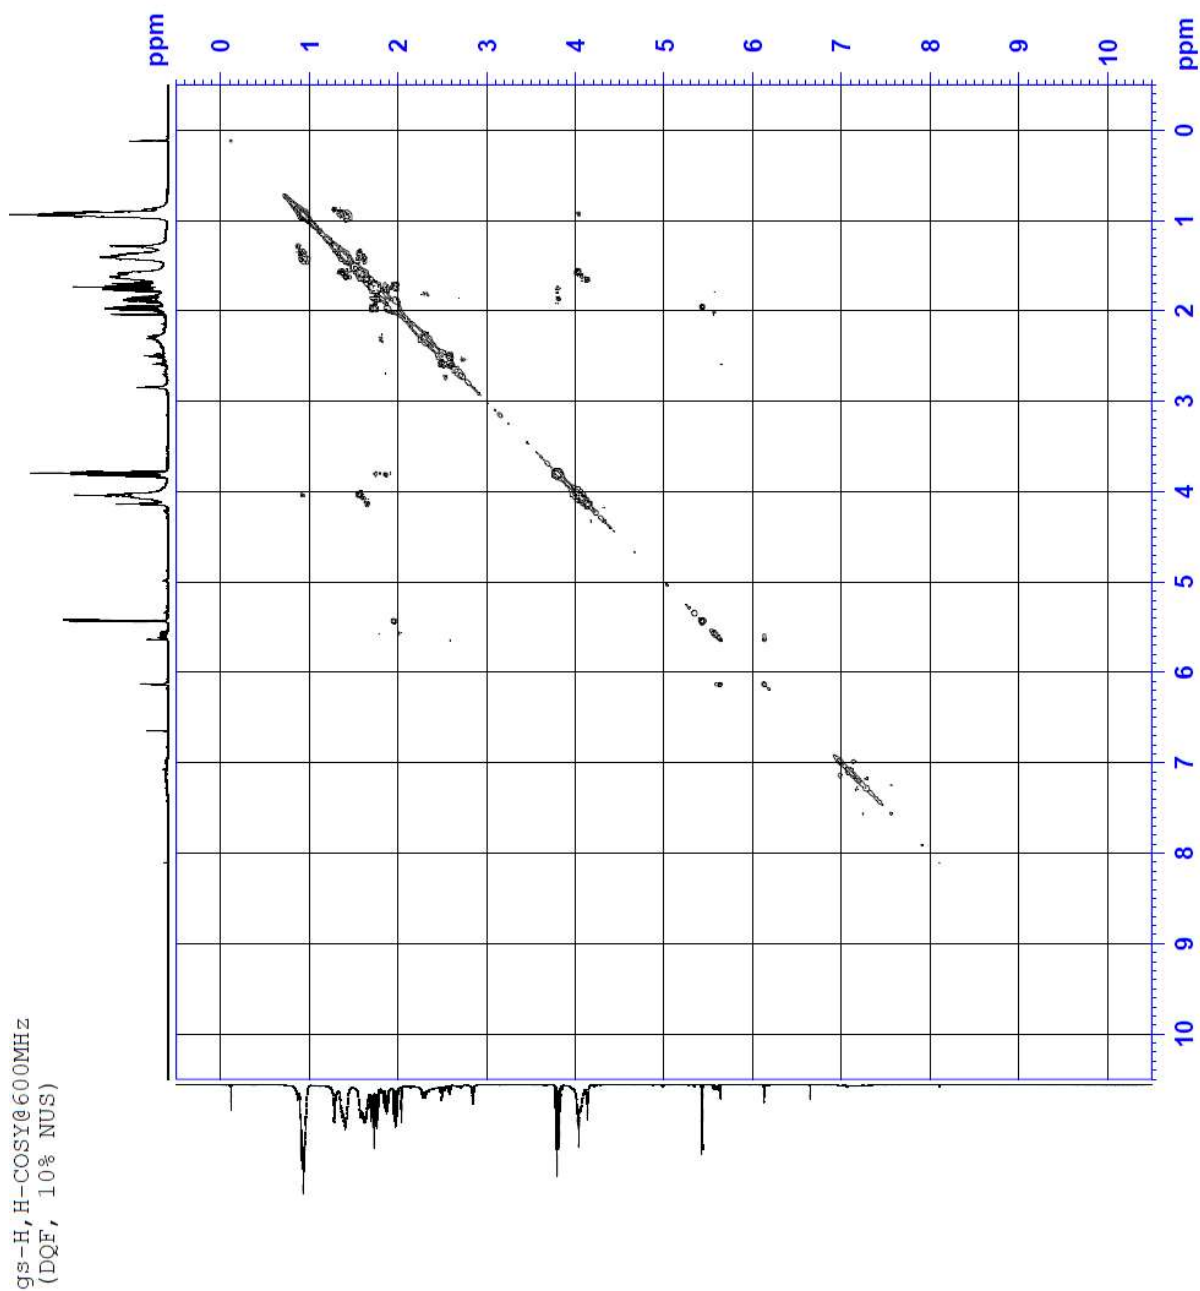

Figure S14:  $^1\text{H}, ^1\text{H}$ -COSY (DQF-COSY) of  $\text{MM}_3=\text{CH}_2$  (600 MHz).

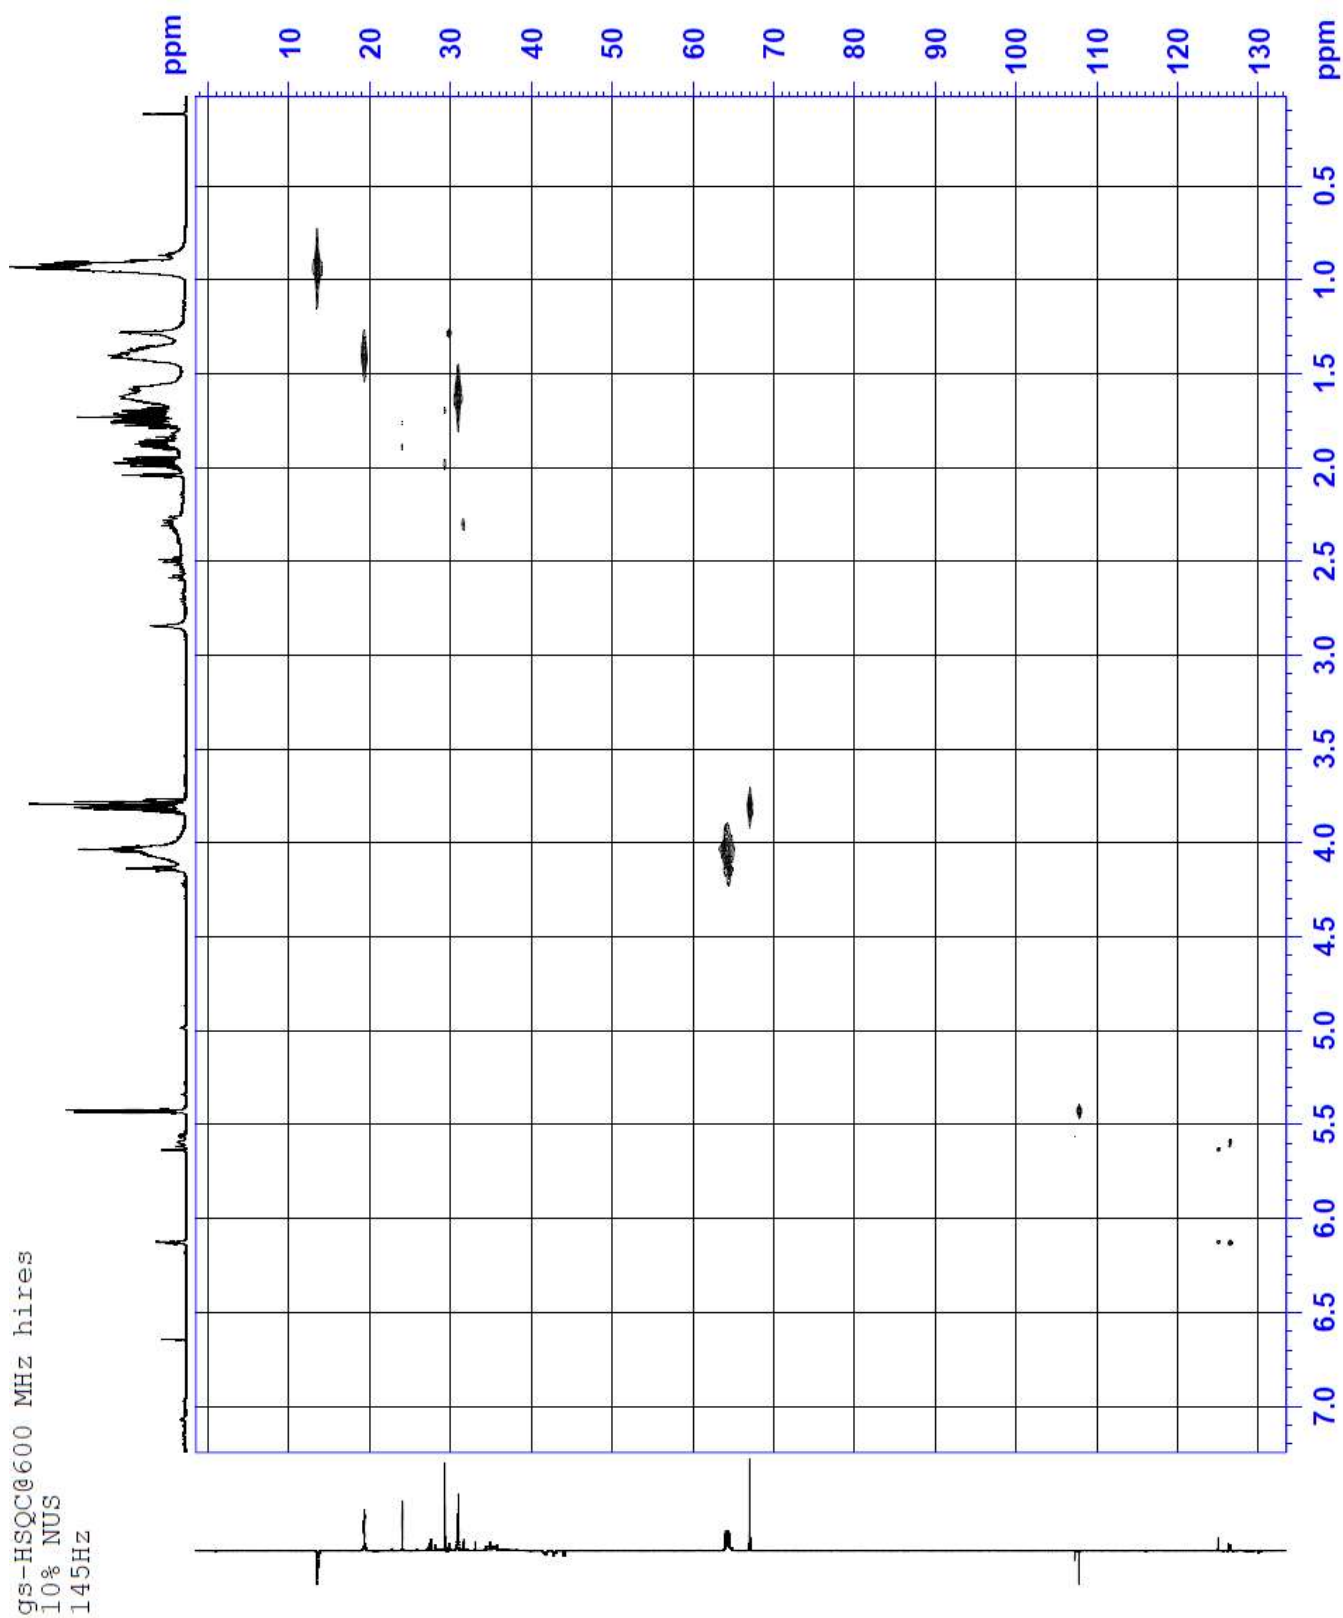

Figure S15:  $^1\text{H}$ ,  $^{13}\text{C}$ -HSQC of  $\text{MM}_3=\text{CH}_2$  (600 MHz).



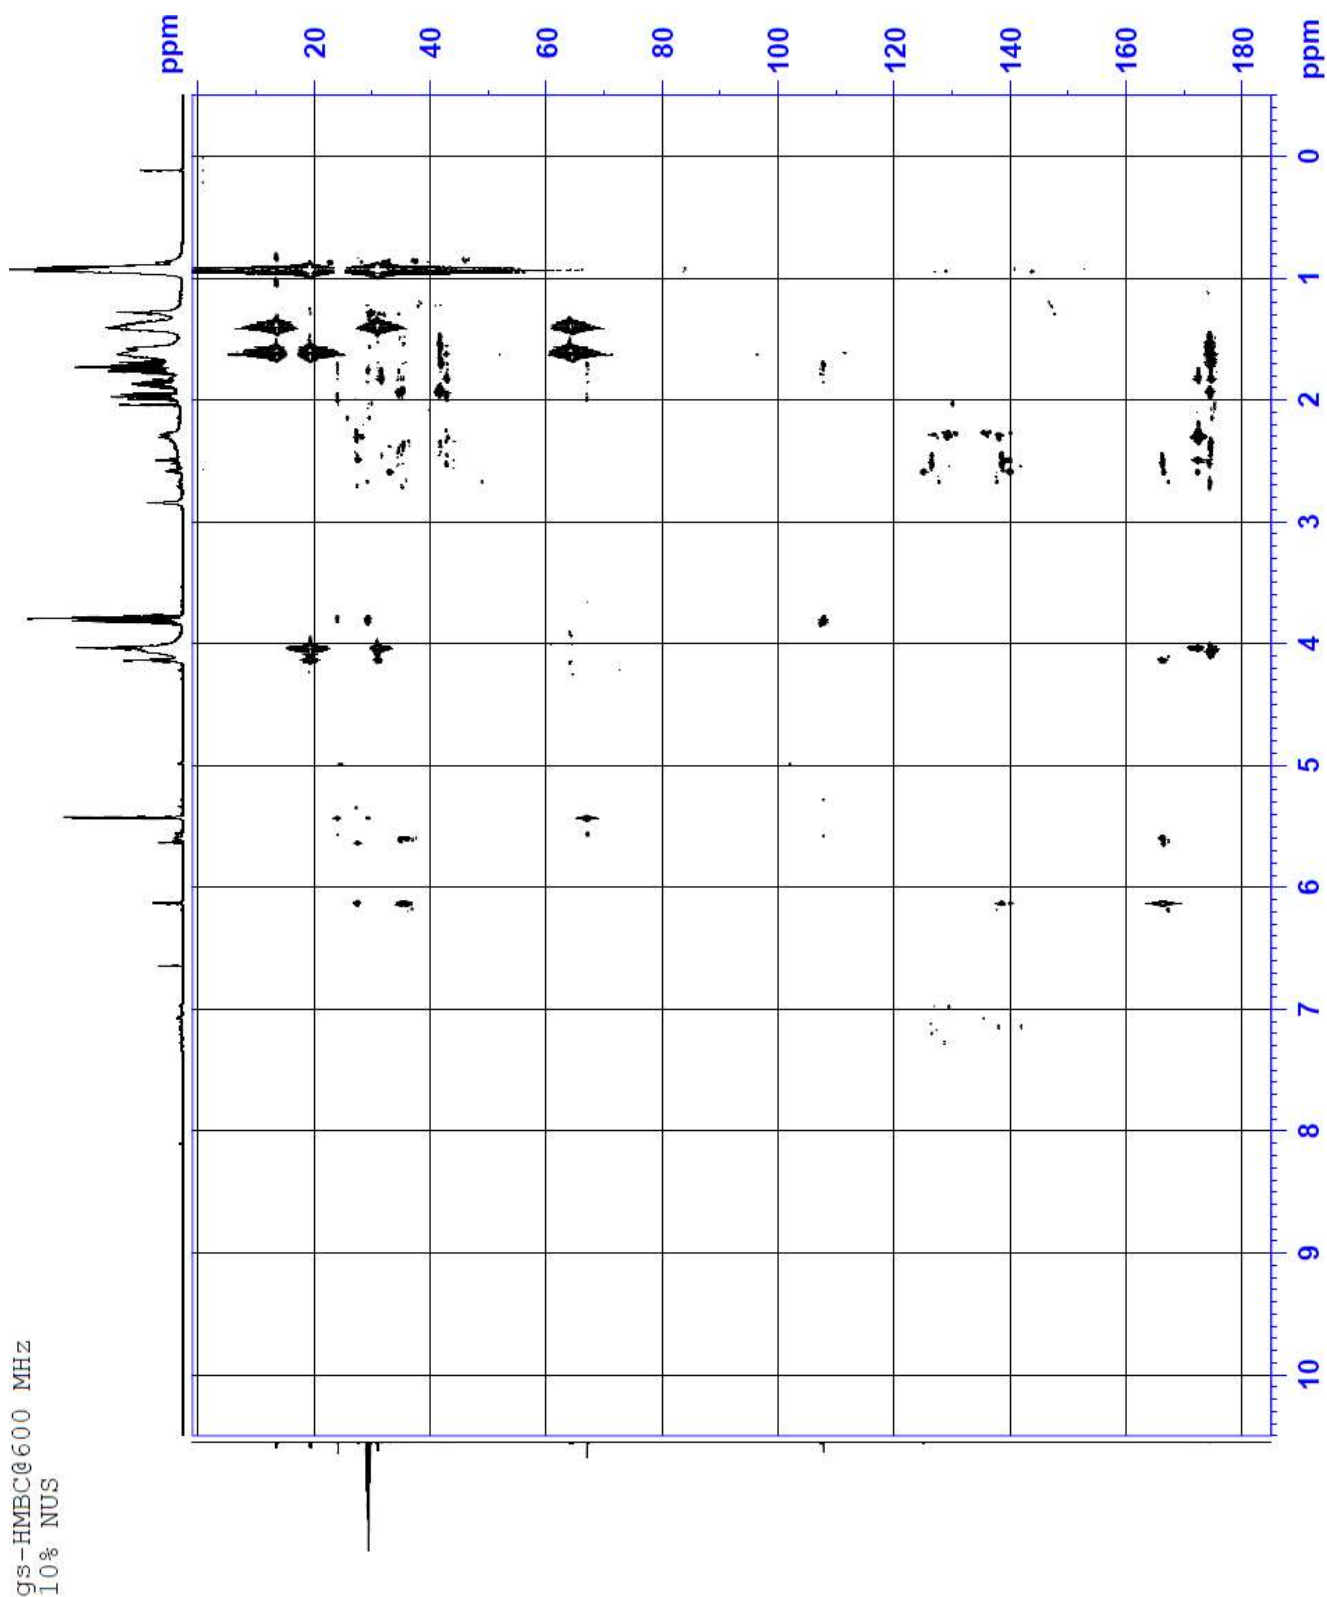

Figure S16:  $^1\text{H},^{13}\text{C}$ -HMBC of  $\text{MM}_3=\text{CH}_2$  (600 MHz).
